# Supplementary material
Source: PubMed Central journal article supplement (PMC4748841)

## **SUPPLEMENTARY INFORMATION**

### **Characterization of Traveling Wave Ion Mobility Separations in Structures for Lossless Ion Manipulations**

Ahmed M. Hamid, Yehia M. Ibrahim, Sandilya V. B. Garimella, Ian K. Webb, Liulin Deng, Tsung-Chi  
Chen, Gordon A. Anderson, Spencer A. Prost, Randolph V. Norheim, Aleksey V. Tolmachev and  
Richard D. Smith\*

Biological Sciences Division, Pacific Northwest National Laboratory, Richland, WA 99352

\*Corresponding Author: Richard D. Smith

Phone: (509) 371-6576

Fax: (509) 371-6564

e-mail address: ([rds@pnnl.gov](mailto:rds@pnnl.gov))

**Figure S-1.** (A) Schematic diagram of the TW-SLIM instrumental arrangement showing the dimensions of RF, traveling wave and guard electrodes.

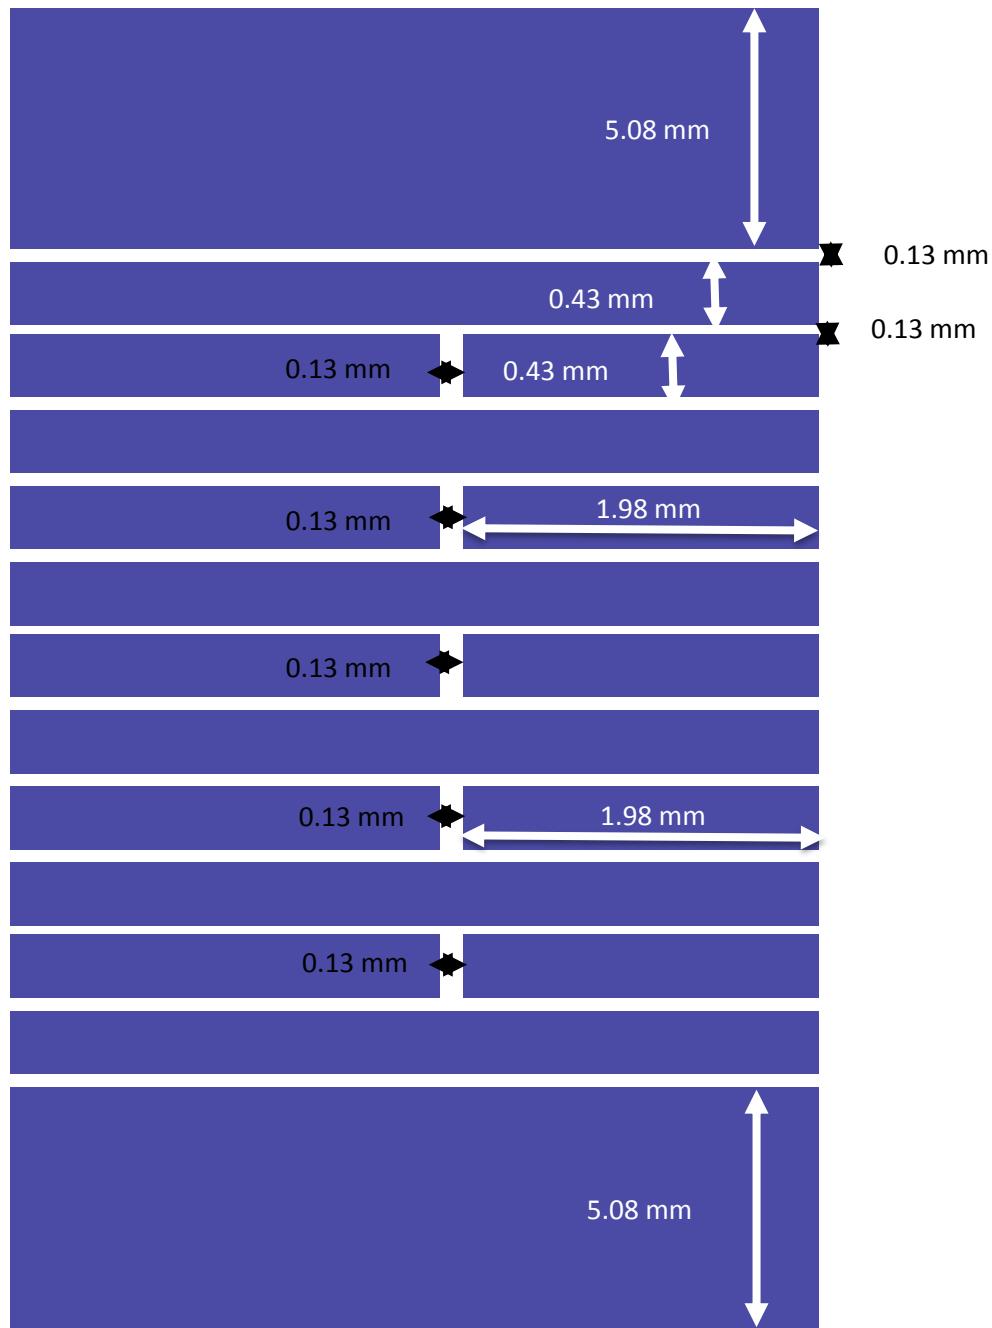

**Figure S-2.** Agilent Tuning mix analyzed by TW-SLIM module (A) mass spectrum, (B) Nested mass and mobility spectra of the abundant ions analyzed by TW-SLIM module. (C) Arrival time distribution of the ions present in the mixture at the following conditions: traveling wave speed was set to 21 m/s using a symmetric square wave (11110000), traveling wave amplitude was set to 30 V, guard bias was set to 15 V, and RF amplitude ( $V_{p-p}$ ) was set to 320 V.

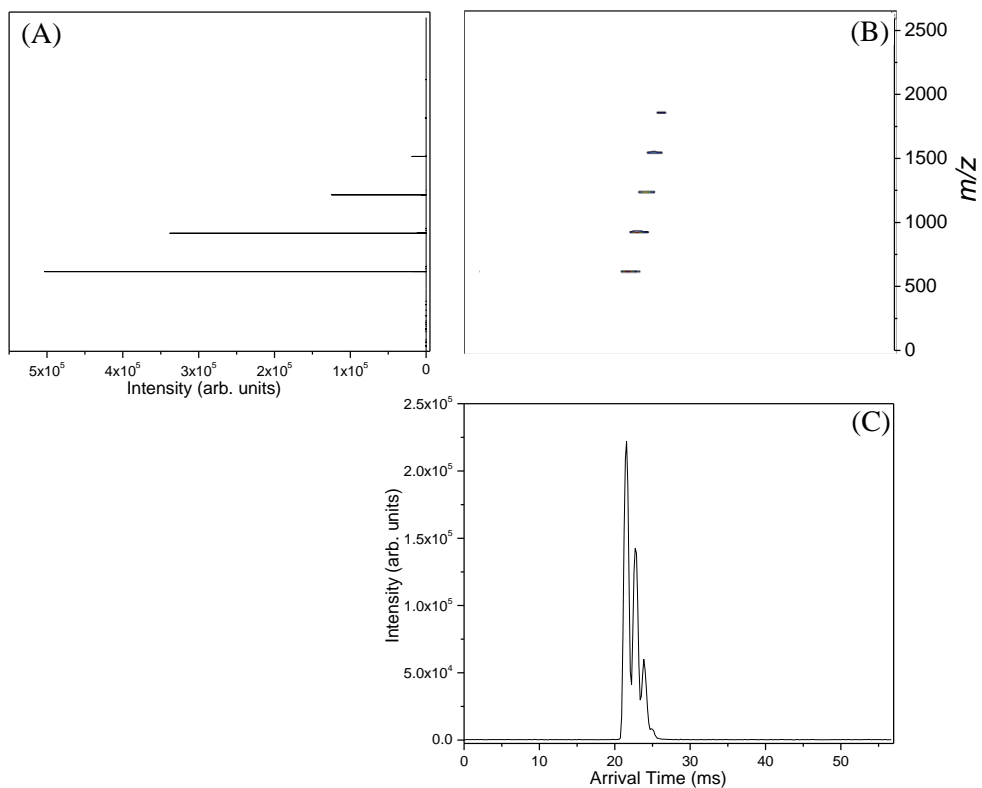

**Figure S-3.** Agilent Tuning mix (A) Arrival time separation of ions  $m/z$  622 and  $m/z$  922 ions (B) Full width at half maximum (FWHM) of  $m/z$  622, 922, 1222, 1522, 1822 and 2122 ions (C) average full width at half maximum (FWHM) of  $m/z$  622, 922, 1222, 1522, 1822 and 2122 ions and arrival time separation of  $m/z$  622 and  $m/z$  2122 ions measured as a function of traveling wave speed at the following settings: traveling wave amplitude was set to 30 V using a symmetric square wave (11110000), guard bias was set to 15V, and RF amplitude ( $V_{p-p}$ ) was set to 320V.

(A)

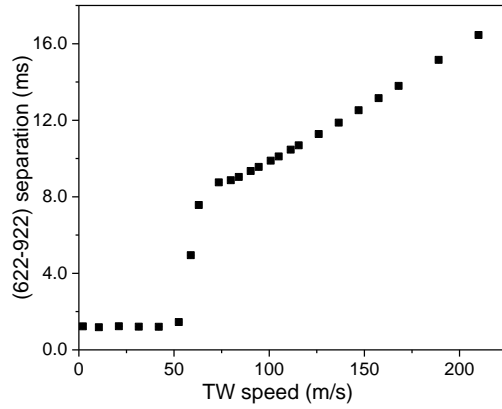

(B)

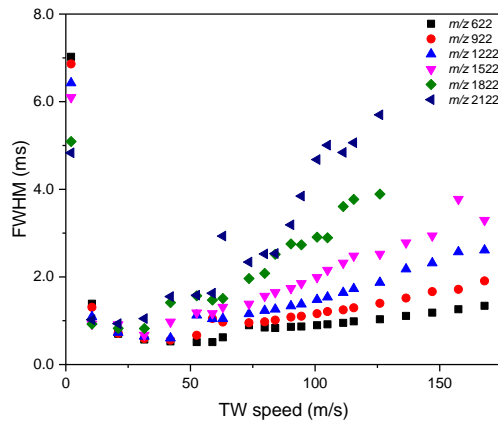

(C)

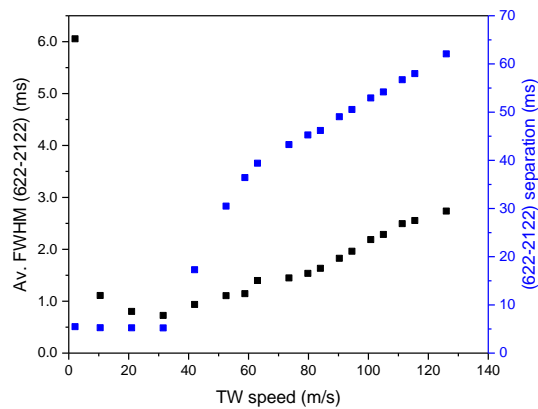

**Figure S-4.** Resolution for the  $m/z$  622 and 922 peaks measured at 84 m/s as a function of RF amplitude at the following settings: a symmetric square wave (11110000), traveling wave amplitude was set to 30 V, and guard bias was set to 15 V.

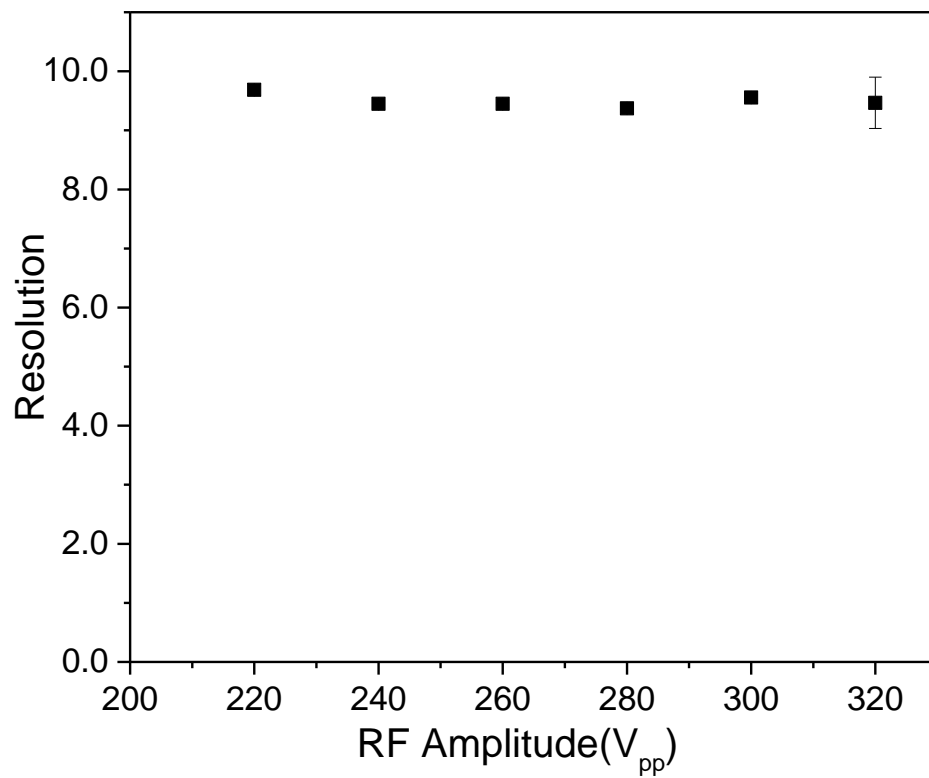

**Figure S-5.** Agilent tuning mix mass spectra obtained at 84 m/s as a function of RF amplitude at the following settings: a symmetric square wave (11110000), traveling wave amplitude was set to 30 V, and guard bias was set to 15 V.

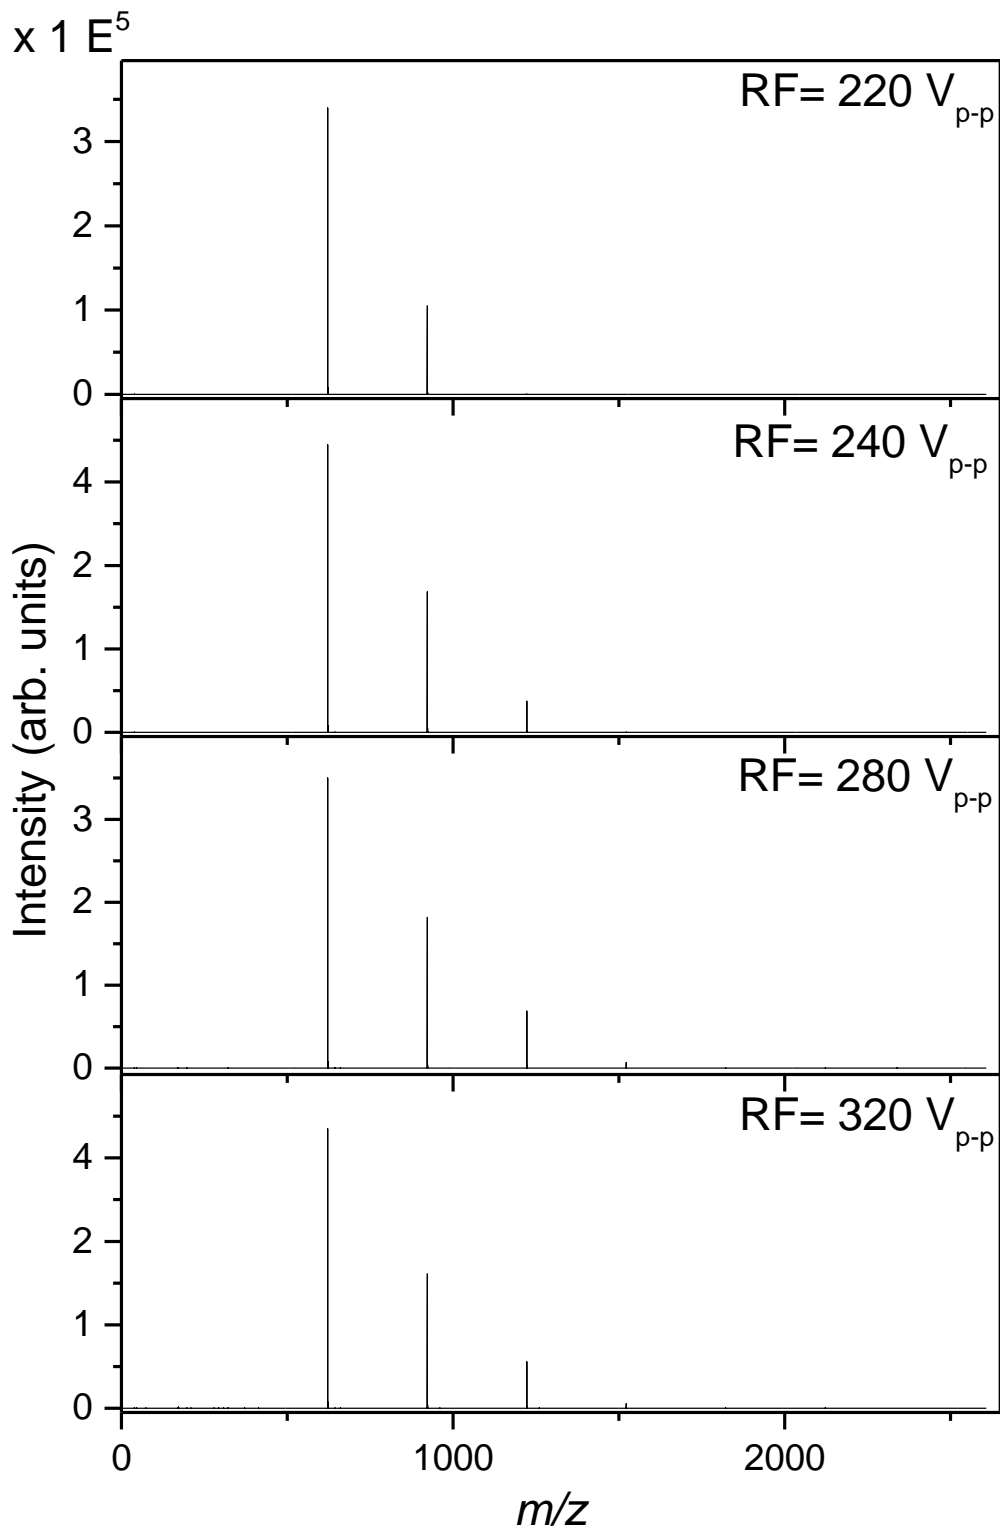

Supplement: NIHMS756979-supplement-Supporting_Information.pdf [file NIHMS756979-supplement-Supporting_Information.pdf]
